# Cancer Surveillance Series: Non-Hodgkin's Lymphoma Incidence by Histologic Subtype in the United States From 1978 Through 1995

Frank D. Groves, Martha S. Linet, Lois B. Travis, Susan S. Devesa

**Background:** Clinical investigations have shown prognostic heterogeneity within the non-Hodgkin's lymphomas (NHLs) according to histology, but few descriptive studies have considered NHLs by subgroup. Our purpose is to assess the demographic patterns and any notable increases in population-based rates of different histologic subgroups of NHL. **Methods:** Using data collected by the Surveillance, Epidemiology, and End Results Program of the National Cancer Institute, we calculated incidence rates for the major clinicopathologic categories of NHL by age, race, sex, geographic area, and time period. **Results:** Among the 60 057 NHL cases diagnosed during the period from 1978 through 1995, total incidence (per 100 000 person-years) was 17.1 and 11.5 among white males and females, respectively, and 12.6 and 7.4 among black males and females, respectively. However, rates for follicular NHLs were two to three times greater among whites than among blacks, with little sex variation. Blacks demonstrated much higher incidence than whites for peripheral T-cell NHL, with the incidence rates higher in males than in females. For other NHL subgroups, the incidence rates for persons less than 60 years of age were generally higher among males than among females, with little racial difference; at older ages, the rates were higher among whites than among blacks, with little sex difference. High-grade NHL was the most rapidly rising subtype, particularly among males. Follicular NHL increased more rapidly in black males than in the other three race/sex groups. Overall, the broad categories of small lymphocytic, follicular, diffuse, high-grade, and peripheral T-cell NHL emerged as distinct entities with specific age, sex, racial, temporal, and geographic variations in rates. **Conclusions:** Findings from our large, population-based study reveal differing demographic patterns and incidence trends according to histologic group. Future descriptive and analytic investigations should evaluate NHL risks according to subtype, as defined by histology and new classification criteria. [J Natl Cancer Inst 2000;92:1240-51]

With an estimated 54 900 new cases projected for the year 2000 in the United States (1), non-Hodgkin's lymphoma (NHL) is now the fifth most common malignant neoplasm after cancers of the breast, prostate, lung, and colon. Although NHL incidence and mortality rates worldwide have risen rapidly during the past few decades (2-4), the reasons for these increases are largely unknown. While risk factors for selected types of NHL have been identified, etiologic influences for most types of NHL are unknown.

There are few comprehensive evaluations of the descriptive epidemiology of NHL that take subtype into account. These types of studies have been limited by the rarity of many NHL subtypes, the lack of a large, population-based incident case

group identified over a long interval and categorized according to a standardized approach, and problems with reproducibility of NHL classification as documented in population-based and clinical settings. Using the Iowa Surveillance, Epidemiology, and End Results (SEER)<sup>1</sup> Program registry data, researchers found 57%-63% agreement among expert pathologists in classifying NHL cases according to the Working Formulation (WF) (5) and 77% agreement among SEER Program coders in assigning the International Classification of Diseases for Oncology (ICD-O) codes to cases (6). Investigators from the Eastern Cooperative Oncology Group were unable to classify 4.3% of the NHL cases using WF categories but found similar levels of agreement (61%) among expert pathologists (7) as did Dick et al. (5).

While recognizing these limitations, we exploited a singular opportunity to examine the patterns and trends of NHL subtypes in a large population according to a standardized classification scheme.

## METHODS

### Ascertainment of Cases

The SEER Program of the National Cancer Institute has compiled incidence data since 1973 from population-based cancer registries in five states (Connecticut, Hawaii, Iowa, New Mexico, and Utah) and in four metropolitan areas (Atlanta, GA; Detroit, MI; San Francisco, CA; and Seattle, WA) that make up approximately 10% of the U.S. population (8). Data routinely collected by participating cancer registries include anatomic site and histology of cancer as well as patient demographic characteristics, such as age, sex, race, and vital status.

### Classification of Cases

Each SEER registry codes all cancers, including NHL, according to a standard classification scheme by use of information from diagnostic pathology reports in medical records. NHL cases diagnosed from 1973 through 1977 were classified according to the *Manual of Tumor Nomenclature and Coding* (MOTNAC) (9). Beginning in 1978, the more detailed scheme of the ICD-O (10) was adopted to code all NHLs and other cancers registered by the SEER Program. Since 1992, the SEER Program has coded NHL and other newly diagnosed cancers using the ICD-O, 2nd Edition (ICD-O-2) (11). The SEER Program used a computerized algorithm to recode the incident cancers diagnosed before 1992 according to ICD-O-2. Since the NHL categories used in MOTNAC were too few and too vague for precise classification, our analysis begins with cases initially diagnosed in 1978, the first year ICD-O was used, and includes 60 057 cases diagnosed through 1995, the most recent available year.

The SEER Program also has used the ICD-O-2 morphology codes to recategorize the NHL cases according to the WF, an NHL classification scheme developed for prognostic purposes (12). There are 10 subtypes (designated A-J)

*Affiliations of authors:* F. D. Groves, S. S. Devesa, (Biostatistics Branch), M. S. Linet, L. B. Travis (Radiation Epidemiology Branch), Division of Cancer Epidemiology and Genetics, National Cancer Institute, Bethesda, MD.

*Correspondence to:* Susan S. Devesa, Ph.D., National Institutes of Health, Executive Plaza South, Rm. 8048, 6120 Executive Blvd., MSC 7244, Bethesda, MD 20892-7244 (e-mail: [devesas@exchange.nih.gov](mailto:devesas@exchange.nih.gov)).

See "Notes" following "References."

in the WF; based on differences in survival, these have been designated as low grade (subtypes A–C), intermediate grade (subtypes D–G), and high grade (subtypes H–J). Overlaid on this clinical grading scheme is the morphologic distinction among the follicular (B–D), diffuse (E–G), and high-grade (H–J) subtypes. Most ICD-O-2 designations correspond to one of the 10 subtypes (13), although several ICD-O-2 categories, such as follicular, NOS (not otherwise specified), diffuse, NOS, and high-grade, NOS, are insufficiently precise to allow for detailed classification using A–J. Therefore, we combined these categories with the 10 WF subtypes to derive six major types, as shown in Table 1: small lymphocytic NHL, follicular NHL, diffuse NHL, high-grade NHL, peripheral T-cell NHL, and NHL, NOS.

### Calculation and Presentation of Rates

Subtype-specific NHL incidence rates were calculated for population subgroups according to age, sex, and race, as well as registry and time period. Age-specific rates were calculated for 18 5-year age groups, expressed as new cases per 100 000 person-years, and then directly age-adjusted to the 1970 U.S. standard population. Age-adjusted, age-specific incidence rates were also ascertained for eight broader age groups (0–14, 15–24, 25–34, 35–44, 45–54, 55–64, 65–74, and ≥75 years).

The figures are presented using uniform semilogarithmic scales so that rates of change can be compared (14). Percent increases for total NHL and for each subtype were calculated by comparing the rates for three 6-year time periods: from 1978 through 1983, from 1984 through 1989, and from 1990 through 1995. For all extranodal NHL cases, we examined incidence by anatomic site of origin and histologic subtype over the entire 18-year period because of the rarity of NHL in many of the extranodal categories. The distribution of NHL cases classified by immunophenotype (B cell versus T cell versus other and unspecified immunophenotypes) was evaluated for the period from 1990 through 1995, since the proportion of NHL cases with immunophenotype recorded in the SEER files before 1990 was small.

### Statistical Considerations and Comparisons of Rates

This study represents a descriptive exploratory analysis looking for patterns, without any *a priori* hypotheses. The variance of an incidence or mortality rate can be approximated by dividing the rate (number of new cases or deaths/100 000 person-years) squared by the number of events (number of new cases or deaths, respectively) on which the rate was based. Differences in rates and ratios of rates can be tested by calculating approximate confidence intervals (CIs) according to (15). If  $c$  = the number of cases,  $p$  = the number of people in the population, and the rate  $r = c/p$ , then the 95% CI for the rate is  $r \pm 1.96 * SQRT[var(r)] = r \pm 1.96 * r/SQRT[c]$ ; the 95% CI for a rate difference is  $(r1 - r2) \pm 1.96 * SQRT[var(r1) + var(r2)] = (r1 - r2) \pm 1.96 * SQRT[r1*r1/c1 + r2*r2/c2]$ ; and the 95% CI for a rate ratio is  $exp[\ln(r1/r2) \pm 1.96 * SQRT(1/c1 + 1/c2)]$ .

## RESULTS

### Age-Adjusted Incidence Rates by Subtype, Race, and Sex

During the period from 1978 through 1995, 60 057 cases of NHL were diagnosed among residents of the nine SEER areas: 53 171 among whites, 3584 among blacks, 2831 among persons of other specified races (2226 Asians, 232 Hawaiians, 138 American Indians or Alaska Natives, 31 Pacific Islanders, and 204 others), and 471 among persons of unknown race. Incidence rates for blacks and whites are shown in Table 2; incidence rates for persons of other races are not included because of small numbers of cases and difficulties in estimating intercensal population denominators.

Across all four race/sex groups, diffuse NHL accounted for 39%–44% of NHL, and small lymphocytic NHL accounted for 9%–10%. The proportion of NOS cases was lower among whites (14% for males and 13% for females) than among blacks (20% for males and 18% for females). The total NHL rates were 40%–70% higher among whites than among blacks and among males than among females. The male-to-female incidence rate ratios were greater than 2 for high-grade and peripheral T-cell NHL and greater than 1 for most other histologic types, but they were close to unity for follicular NHL among whites. The white-to-black incidence rate ratios were around 2–3 for follicular NHL and ranged between 1 and 2 for most other major types but were less than 1 for peripheral T-cell NHL.

### Age-Specific Incidence Rates

Total NHL incidence rates (Fig. 1) increased monotonically with age in all race and sex subgroups. No racial differences were observed in the age-specific incidence curves until age 45 years for males and age 35 years for females; after these ages, the rates were higher in whites than in blacks. Age-specific incidence rates were higher in males than in females at all ages, regardless of race. Rates for NHL, NOS, increased with age, with higher rates among blacks than among whites for ages 15–64 years among males and for ages 15–54 years among females; rates were notably higher among males than among females for ages 15–64 years and, subsequently, there was little

**Table 1.** Classification of non-Hodgkin's lymphoma\*

| Major types       | Working Formulation subtypes | ICD-O-2 codes                                                                |
|-------------------|------------------------------|------------------------------------------------------------------------------|
| Small lymphocytic | A: Small lymphocytic         | 9670, 9671                                                                   |
| Follicular        | B: Follicular small          | 9693, 9694, 9695, 9696                                                       |
|                   | C: Follicular mixed          | 9691, 9692                                                                   |
|                   | D: Follicular large          | 9697, 9698                                                                   |
|                   | (Follicular, NOS)†           | 9690                                                                         |
| Diffuse           | E: Diffuse small             | 9672, 9673, 9674                                                             |
|                   | F: Diffuse mixed             | 9675, 9676                                                                   |
|                   | G: Diffuse large             | 9593, 9680, 9681, 9682, 9683                                                 |
|                   | (Diffuse, NOS)†              | 9595, 9677, 9688, 9710, 9711, 9715                                           |
| High-grade        | H: Immunoblastic             | 9684                                                                         |
|                   | I: Lymphoblastic             | 9685                                                                         |
|                   | J: Small noncleaved          | 9686, 9687                                                                   |
|                   | (High-grade, NOS)†           | 9594                                                                         |
| Peripheral T-cell |                              | 9700, 9701, 9702, 9703, 9704, 9705, 9706, 9707, 9708, 9709, 9712, 9713, 9714 |
| NOS               |                              | 9590, 9591, 9592                                                             |

\*ICD-O-2 = International Classification of Diseases for Oncology, 2nd edition (11); NOS = not otherwise specified.

†Subtypes within parentheses were not categorized to a specific subtype A–J but were included in the respective major type.

**Table 2.** Non-Hodgkin's lymphoma cases and incidence rates\* in nine SEER areas (from 1978 through 1995) by race, sex, and histology†

| Histology            | White males |      | White females |      | Black males |      | Black females |      | Rate ratios                   |                               |                             |                                 |
|----------------------|-------------|------|---------------|------|-------------|------|---------------|------|-------------------------------|-------------------------------|-----------------------------|---------------------------------|
|                      | No.         | Rate | No.           | Rate | No.         | Rate | No.           | Rate | White males/<br>white females | Black males/<br>black females | White males/<br>black males | White females/<br>black females |
| Total                | 28 635      | 17.1 | 24 536        | 11.5 | 2114        | 12.6 | 1470          | 7.4  | 1.5                           | 1.7                           | 1.4                         | 1.6                             |
| Small lymphocytic    |             |      |               |      |             |      |               |      |                               |                               |                             |                                 |
| A: Small lymphocytic | 2617        | 1.6  | 2342          | 1.1  | 205         | 1.4  | 148           | 0.8  | 1.5                           | 1.8                           | 1.1                         | 1.4                             |
| Follicular           | 4969        | 3.0  | 5451          | 2.7  | 205         | 1.3  | 176           | 0.9  | 1.1                           | 1.5                           | 2.3                         | 3.1                             |
| B: Follicular small  | 2591        | 1.6  | 2685          | 1.3  | 93          | 0.6  | 72            | 0.4  | 1.2                           | 1.6                           | 2.6                         | 3.6                             |
| C: Follicular mixed  | 1307        | 0.8  | 1582          | 0.8  | 48          | 0.3  | 54            | 0.3  | 1.0                           | 1.1                           | 2.5                         | 2.9                             |
| D: Follicular large  | 642         | 0.4  | 751           | 0.4  | 38          | 0.2  | 26            | 0.1  | 1.1                           | 1.6                           | 1.7                         | 2.6                             |
| (Follicular, NOS)‡   | 429         | 0.3  | 433           | 0.2  | 26          | 0.2  | 24            | 0.1  | 1.2                           | 1.5                           | 1.6                         | 1.9                             |
| Diffuse              | 12 157      | 7.3  | 10 930        | 5.0  | 831         | 5.1  | 623           | 3.2  | 1.4                           | 1.6                           | 1.4                         | 1.6                             |
| E: Diffuse small     | 2365        | 1.5  | 1975          | 0.9  | 146         | 1.0  | 126           | 0.7  | 1.6                           | 1.5                           | 1.5                         | 1.4                             |
| F: Diffuse mixed     | 1472        | 0.9  | 1512          | 0.7  | 111         | 0.7  | 98            | 0.5  | 1.3                           | 1.4                           | 1.3                         | 1.4                             |
| G: Diffuse large     | 8133        | 4.8  | 7291          | 3.4  | 562         | 3.3  | 391           | 1.9  | 1.4                           | 1.7                           | 1.5                         | 1.7                             |
| (Diffuse, NOS)‡      | 187         | 0.1  | 152           | 0.1  | 12          | 0.1  | 8             | 0.0  | 1.6                           | 2.0                           | 1.4                         | 1.8                             |
| High-grade           | 3408        | 2.0  | 1776          | 0.9  | 278         | 1.5  | 129           | 0.6  | 2.3                           | 2.3                           | 1.4                         | 1.3                             |
| H: Immunoblastic     | 1825        | 1.0  | 1121          | 0.5  | 148         | 0.8  | 88            | 0.4  | 2.0                           | 1.9                           | 1.3                         | 1.2                             |
| I: Lymphoblastic     | 377         | 0.2  | 173           | 0.1  | 43          | 0.2  | 15            | 0.1  | 2.6                           | 2.7                           | 1.2                         | 1.3                             |
| J: Small noncleaved  | 1183        | 0.7  | 462           | 0.2  | 84          | 0.4  | 25            | 0.1  | 3.1                           | 3.4                           | 1.8                         | 1.9                             |
| (High-grade, NOS)‡   | 23          | 0.0  | 20            | 0.0  | 3           | 0.0  | 1             | 0.0  | 1.0                           | 2.0                           | 0.5                         | 1.0                             |
| Peripheral T-cell    | 1346        | 0.8  | 784           | 0.4  | 168         | 1.1  | 126           | 0.6  | 2.1                           | 1.8                           | 0.8                         | 0.6                             |
| NOS                  | 4138        | 2.4  | 3253          | 1.4  | 427         | 2.4  | 268           | 1.3  | 1.7                           | 1.8                           | 1.0                         | 1.1                             |

\*All rates are per 100 000 person-years at-risk, age-adjusted to the 1970 U.S. population.

†SEER = Surveillance, Epidemiology, and End Results Program; NOS = not otherwise specified.

‡Subtypes within parentheses were not categorized to a specific subtype A–J but were included in the respective major type.

difference in rates according to sex among persons aged 65 years or older.

Peripheral T-cell NHL increased with age and was more common among blacks than among whites at almost all ages, although the male excess among blacks became apparent only after the age of 35 years. Small lymphocytic NHL rates increased exponentially with age to reach more than 100-fold greater for all whites over the age of 75 years than for those aged 25–34 years, and the rates showed little racial disparity. For follicular NHL and for its subtypes, rates rose with age, although sex differences were small, and whites of both sexes had higher rates than blacks at most ages.

Diffuse NHL rates increased with age but varied little between the races among the middle-aged groups; rates were higher among whites at older ages. High-grade NHL was the only type to occur notably among children. The excess in males of high-grade NHL, mostly small noncleaved NHL, was particularly marked under the age of 50 years; no consistent racial disparity was evident. In contrast to the more rapid rise in incidence occurring with increasing age for all other subtypes of NHL, the age-specific incidence of small noncleaved NHL increased relatively slowly with age, and lymphoblastic NHL actually showed a “U-shaped” age-specific incidence curve. (High-grade NHL rates by subtype among females were so low that they are not shown in Fig. 1.) Thus, similarities in the shapes of the age-specific incidence curves of the subtypes within each major type support the aggregation of the three follicular subtypes, the three diffuse subtypes, and the three high-grade subtypes.

### Regional Variation in Age-Adjusted Incidence Rates Among Whites

Data presented (Table 3) are limited to whites because the numbers of NHL cases among blacks were too small to allow for

meaningful geographic comparisons. Among whites, the geographic patterns differ according to sex, and the registry-specific data are listed within sex in decreasing order of total NHL rate. For males, age-adjusted incidence rates in San Francisco were higher than the SEER rates for total NHL and for every major subtype except small lymphocytic NHL. Rates in New Mexico were lower than the SEER rates for total NHL and for every major subtype as well. Male total NHL incidence rates were 82% higher in San Francisco than in New Mexico; the San Francisco excess was largely attributable to the elevated rates for diffuse NHL (76% higher in San Francisco than in New Mexico) and high-grade NHL (almost twice as high in San Francisco than in New Mexico).

Among females, age-adjusted incidence rates in both Detroit and Connecticut were higher than the SEER rates for total NHL and for high-grade NHL in Detroit and for small lymphocytic NHL in Connecticut, although these differences were small. Rates for females in New Mexico were lower than the SEER rates for total NHL and for the small lymphocytic, follicular, and diffuse subtypes. With total NHL incidence in Detroit being only 33% higher than in New Mexico, it is clear that there is less variation in NHL incidence among females than among males. In particular, the rates among white females in San Francisco were close to the SEER rates for most NHL subtypes, in contrast to the marked excesses observed there among white males.

### Site Distribution of Extranodal Lymphomas by Subtype

Approximately 27% of all NHL cases were extranodal (Table 4); for most histologic groups, this fraction ranged between 21% and 33%, with two notable exceptions: 82% of peripheral T-cell NHL cases were extranodal, almost all of which involved the skin, and only 9% of follicular NHL cases were extranodal. Almost half of all extranodal NHL cases were of a diffuse his-

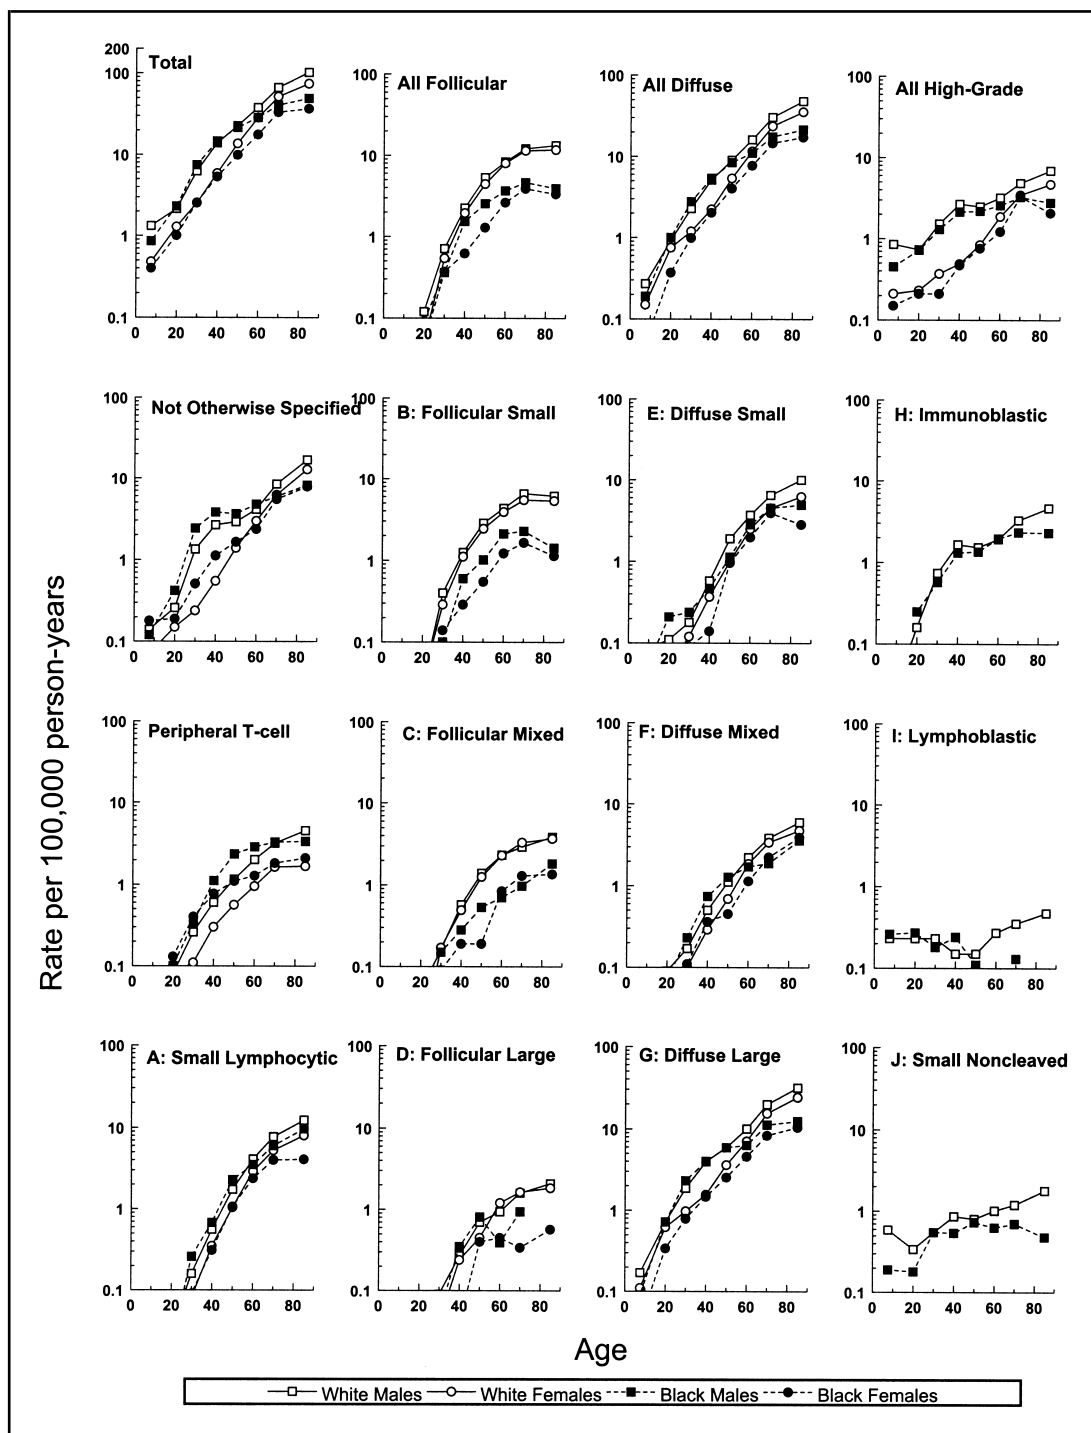

**Fig. 1.** Incidence rates for non-Hodgkin's lymphoma in the nine Surveillance, Epidemiology, and End Results areas for the period from 1978 through 1995 by age group 0-14, 15-24, 25-34, . . . , 65-74, greater than or equal to 75 years of age. *Note:* each rate was plotted at the mid-point of the age interval. Data were not shown for females in **panels I and J** because of small numbers and low rates.

tology. The majority of the NHLs arising from the following sites had a diffuse histologic pattern: stomach, small intestine, colon, soft tissue, thyroid, and testis. Most extranodal NHLs were concentrated in just four sites: skin, stomach, brain, and small intestine. About half of cerebral NHLs were of an unspecified histology.

#### Immunophenotype Distribution by Subtype

In recent years, the SEER Program has collected immunophenotypic data for NHL. Before 1990, fewer than one fourth of all NHL cases in the SEER database had immunophenotypic data recorded. Between 1990 and 1995, almost 61% of all NHL cases still were recorded as unknown immunophenotype, about

34% were B-cell type, and approximately 6% were T-cell type (Table 5). During the period from 1990 through 1995, the proportion of cases not specified as T or B cell ranged by subtype from 36% to 100%. The percentage of NHL cases of unknown phenotypic type decreased from 68% in 1990 to 53% in 1995.

#### Trends in Incidence of NHL

During the period from 1978-1983 to 1990-1995, age-adjusted total NHL incidence rates (Fig. 2) increased by 77% in black males and by 53% in white males but only by 39% and 33% among black and white females, respectively. When a more detailed evaluation was conducted to compare the change in incidence among three time periods (1978-1983, 1984-1989,

**Table 3.** Non-Hodgkin's lymphoma cases and incidence rates\* among whites (from 1978 through 1995) by histology and SEER area†

| Sex and registry‡          | No. of cases | Incidence rates |                   |            |         |            |                   |     | % NOS of total |
|----------------------------|--------------|-----------------|-------------------|------------|---------|------------|-------------------|-----|----------------|
|                            |              | Total§          | Small lymphocytic | Follicular | Diffuse | High-grade | Peripheral T-cell | NOS |                |
| <b>Males</b>               |              |                 |                   |            |         |            |                   |     |                |
| San Francisco–Oakland (CA) | 5700         | 22.2            | 1.6               | 3.4        | 9.0     | 3.4        | 1.2               | 3.7 | 16.5           |
| Seattle–Puget Sound (WA)   | 4420         | 17.4            | 1.7               | 3.1        | 7.1     | 1.7        | 0.9               | 3.0 | 17.0           |
| Metropolitan Detroit (MI)  | 4458         | 16.8            | 1.8               | 3.0        | 6.9     | 1.7        | 0.8               | 2.6 | 15.5           |
| Connecticut                | 4610         | 16.5            | 1.8               | 2.7        | 7.0     | 1.8        | 0.9               | 2.3 | 13.8           |
| Hawaii                     | 418          | 16.3            | 1.2               | 2.6        | 6.9     | 3.2        | 0.4               | 2.0 | 12.5           |
| Iowa                       | 4368         | 16.2            | 1.6               | 3.6        | 7.9     | 1.3        | 0.6               | 1.2 | 7.6            |
| Metropolitan Atlanta (GA)  | 1689         | 15.7            | 1.6               | 2.7        | 7.2     | 1.7        | 0.7               | 1.7 | 10.9           |
| Utah                       | 1628         | 14.8            | 1.4               | 2.2        | 6.3     | 2.2        | 0.5               | 2.2 | 15.2           |
| New Mexico                 | 1344         | 12.2            | 0.9               | 2.4        | 5.1     | 1.7        | 0.6               | 1.6 | 13.1           |
| Nine SEER areas            | 28 635       | 17.1            | 1.6               | 3.0        | 7.3     | 2.0        | 0.8               | 2.4 | 14.1           |
| <b>Females</b>             |              |                 |                   |            |         |            |                   |     |                |
| Metropolitan Detroit       | 4212         | 12.1            | 1.1               | 2.9        | 5.0     | 1.0        | 0.4               | 1.8 | 14.5           |
| Connecticut                | 4483         | 12.0            | 1.2               | 2.6        | 5.1     | 1.0        | 0.4               | 1.7 | 13.9           |
| Iowa                       | 4349         | 11.8            | 1.0               | 3.0        | 6.0     | 0.7        | 0.3               | 0.8 | 6.9            |
| San Francisco–Oakland      | 3685         | 11.8            | 1.1               | 2.8        | 5.1     | 0.9        | 0.6               | 1.3 | 10.9           |
| Seattle–Puget Sound        | 3512         | 11.3            | 1.0               | 2.8        | 4.8     | 0.7        | 0.4               | 1.7 | 14.7           |
| Metropolitan Atlanta       | 1477         | 11.0            | 1.1               | 2.6        | 5.0     | 0.7        | 0.3               | 1.3 | 11.5           |
| Utah                       | 1376         | 10.5            | 0.9               | 1.9        | 4.6     | 1.0        | 0.4               | 1.8 | 16.7           |
| Hawaii                     | 244          | 10.0            | 1.1               | 2.5        | 4.2     | 1.0        | 0.3               | 0.9 | 9.2            |
| New Mexico                 | 1198         | 9.1             | 0.8               | 2.1        | 3.6     | 1.0        | 0.3               | 1.4 | 14.8           |
| Nine SEER areas            | 24 536       | 11.5            | 1.1               | 2.7        | 5.0     | 0.9        | 0.4               | 1.4 | 12.5           |

\*All rates are per 100 000 person-years at-risk, age-adjusted to the 1970 U.S. population.

†SEER = Surveillance, Epidemiology, and End Results Program; NOS = not otherwise specified.

‡Registries listed within sex in decreasing order of total rate.

§Because of rounding, the total rate may not equal the sum of the subtype rates.

**Table 4.** Non-Hodgkin's lymphoma cases and incidence rates\* (all races and both sexes) in nine SEER areas (from 1978 through 1995) by histology and site†

| Site            | No. of cases | Incidence rates |                   |            |         |            |                   |      |
|-----------------|--------------|-----------------|-------------------|------------|---------|------------|-------------------|------|
|                 |              | Total‡          | Small lymphocytic | Follicular | Diffuse | High-grade | Peripheral T-cell | NOS  |
| All sites       | 60 057       | 13.5            | 1.3               | 2.6        | 5.8     | 1.4        | 0.6               | 1.9  |
| Nodal           | 43 677       | 9.9             | 1.0               | 2.4        | 4.2     | 1.0        | 0.1               | 1.3  |
| Extranodal      | 16 380       | 3.7             | 0.3               | 0.2        | 1.7     | 0.4        | 0.5               | 0.6  |
| Skin            | 2969         | 0.7             | <0.1              | <0.1       | 0.1     | <0.1       | 0.5               | 0.1  |
| Stomach         | 2717         | 0.6             | 0.1               | <0.1       | 0.4     | <0.1       | <0.1              | 0.1  |
| Brain           | 1569         | 0.3             | <0.1              | <0.1       | 0.1     | 0.1        | <0.1              | 0.2  |
| Small intestine | 1185         | 0.3             | <0.1              | <0.1       | 0.1     | 0.1        | <0.1              | <0.1 |
| Lung            | 647          | 0.1             | <0.1              | <0.1       | 0.1     | <0.1       | <0.1              | <0.1 |
| Soft tissue     | 639          | 0.1             | <0.1              | <0.1       | 0.1     | <0.1       | <0.1              | <0.1 |
| Colon           | 596          | 0.1             | <0.1              | <0.1       | 0.1     | <0.1       | <0.1              | <0.1 |
| Eye             | 534          | 0.1             | <0.1              | <0.1       | <0.1    | <0.1       | <0.1              | <0.1 |
| Thyroid         | 502          | 0.1             | <0.1              | <0.1       | 0.1     | <0.1       | <0.1              | <0.1 |
| All other sites | 5022         | 1.1             | 0.1               | 0.1        | 0.6     | 0.1        | <0.1              | 0.2  |

\*All rates are per 100 000 person-years at-risk, age-adjusted to the 1970 U.S. population. *Note:* No rates were based on zero cases.

†SEER = Surveillance, Epidemiology, and End Results Program; NOS = not otherwise specified.

‡Because of rounding, the total rate may not equal the sum of the subtype rates.

and 1990–1995), the percentage increase slowed from 32% (from 1978–1983 to 1984–1989) to 16% (from 1984–1989 to 1990–1995) among white males, from 20% to 11% among white females, and from 19% to 17% among black females; only among black males did the percentage increase accelerate, from 21% to 46%.

High-grade NHL increased most rapidly between 1978–1983

and 1990–1995, tripling among males and doubling among females. Immunoblastic NHL was the fastest-growing high-grade subtype, followed by small noncleaved and lymphoblastic NHL (in that order). Other histologic types increased more slowly. Small lymphocytic NHL increased by 36%–44% in all four race/sex groups. Follicular NHL remained stable among black females and increased only 16%–22% among whites from 1978 to

**Table 5.** Non-Hodgkin's lymphoma cases (all races and both sexes) in nine SEER areas (from 1990 through 1995) by immunophenotype and histology\*

| Histology            | No. of cases | Immunophenotype |           |                         |
|----------------------|--------------|-----------------|-----------|-------------------------|
|                      |              | T cell, %       | B cell, % | Not specified T or B, % |
| Total                | 25 364       | 5.7             | 33.7      | 60.6                    |
| Small lymphocytic    |              |                 |           |                         |
| A: Small lymphocytic | 2217         | 1.1             | 30.1      | 68.8                    |
| Follicular           | 4356         | 0.6             | 32.4      | 67.0                    |
| B: Follicular small  | 1948         | 0.5             | 30.2      | 69.4                    |
| C: Follicular mixed  | 1399         | 0.6             | 31.0      | 68.4                    |
| D: Follicular large  | 712          | 1.0             | 39.8      | 59.3                    |
| (Follicular, NOS)†   | 297          | 1.4             | 35.7      | 63.0                    |
| Diffuse              | 10 452       | 4.6             | 40.5      | 54.9                    |
| E: Diffuse small     | 1345         | 1.0             | 31.3      | 67.7                    |
| F: Diffuse mixed     | 1102         | 11.3            | 30.0      | 58.7                    |
| G: Diffuse large     | 7677         | 4.3             | 43.1      | 52.7                    |
| (Diffuse, NOS)†      | 328          | 4.0             | 52.3      | 43.3                    |
| High-grade           |              |                 |           |                         |
| H: Immunoblastic     | 1861         | 7.1             | 41.1      | 51.9                    |
| I: Lymphoblastic     | 253          | 43.9            | 19.8      | 36.4                    |
| J: Small noncleaved  | 788          | 1.0             | 37.9      | 61.0                    |
| (High-grade, NOS)†   | 2            | 0.0             | 0.0       | 100.0                   |
| Peripheral T-cell    | 1310         | 38.1            | 6.3       | 55.6                    |
| NOS                  | 4125         | 3.7             | 25.5      | 70.8                    |

\*SEER = Surveillance, Epidemiology, and End Results Program; NOS = not otherwise specified.

†Subtypes within parentheses were not categorized to a specific subtype A–J but were included in the respective major type.

1995 but increased among black males by 25% between 1978–1983 and 1984–1989, followed by an even larger increase of 42% between 1984–1989 and 1990–1995, for a total increase of 77%. Diffuse NHL rose by 30%–41% among males versus 19%–25% among females, with the greatest increase (50%–91%) seen for diffuse large NHL. Diffuse small NHL was the only subtype that declined (42%–47%) in all four race/sex groups. Although incidence rates for peripheral T-cell NHL remained higher among blacks than among whites, the rate of increase was greater among whites (134%–161%) than among blacks (52%–84%), narrowing the racial gap. NHL, NOS, increased faster among males (128%–160%) than among females (42%–73%), with little difference by race within sex.

## DISCUSSION

Our study is distinct in analyzing more than 60 000 NHL cases from a well-defined population simultaneously by age, sex, race, and histologic type, as well as by geographic area and time period of diagnosis. Major histologic categories of NHL differ in key characteristics. Follicular NHL is twice as common in whites as in blacks, but the male/female ratio is close to unity; however, the disproportionately rapid increase from 1978 through 1995 among black males has tended to increase the male/female ratio among blacks while reducing the white/black ratio among males. Diffuse NHL occurs more frequently among males than among females at middle ages and among whites than among blacks at older ages. Diffuse NHL accounts for close to half of the extranodal NHL, arising in the stomach, small intestine, colon, soft tissue, and thyroid. The incidence of high-grade NHL tripled among males and doubled among females from 1978 through 1995. High-grade and peripheral T-cell NHL

are both twice as common in males as in females. Peripheral T-cell accounts for 5%–10% of NHL in all age groups and is unique among subtypes in being more common among blacks than among whites. The subtype-specific NHL incidence patterns may reflect the influence of different etiologic as well as host factors as summarized below.

## Risk Factors Related to Functional Immunologic Abnormalities

NHL is a malignancy of lymphocytes, the primary effector cells of the immune system. Disorders characterized by severe immunologic compromise or even moderately serious immune dysfunction have been consistently linked with excesses of NHL (*see below*). Conversely, selected exposures that may be associated with low-to-moderate immune effects, such as infections, vaccinations, allergies, medications, and other influences, may be inversely associated with NHL risk (16,17).

**Therapeutic immunosuppression.** Increased rates of NHL have been described in a clinical series of patients treated with immunosuppressive drugs following transplantation with donor kidneys (35- to 59-fold) (18–20) or heart or bone marrow (68- to 336-fold) (21,22). The cumulative incidence of NHL, however, is only about 1% 10 years after bone marrow transplantation (23). NHL after solid organ transplants tends to be of diffuse large or immunoblastic histology (24), and extranodal involvement is common (25). Despite the dramatic increase from 12 788 organ transplants in the United States in 1988 to 20 354 in 1996 (26), transplant-associated NHL accounts for a minuscule fraction of this malignancy.

**Autoimmunity.** Relative risks ranging from 2 to 44 for NHL have been observed in patients with celiac disease or dermatitis herpetiformis (27,28), systemic lupus erythematosus (29,30), sicca syndrome (31,32), and rheumatoid arthritis (33–38), with lower risks in population-based studies (30,37,38), although data on histologic type of NHL are limited. NHL-related autoimmune diseases are unlikely to contribute meaningfully to rising secular trends in NHL, since the incidence of autoimmune disorders has either not increased (39) or risen only modestly (40) over time.

**Congenital immunodeficiency.** Data from the Immunodeficiency Cancer Registry (41) are consistent with notably increased risks of NHL among children with congenital X-linked immunodeficiency and severe combined system immunodeficiency, as well as with excesses in young persons with ataxia-telangiectasia or Wiskott–Aldrich syndrome. The rarity of congenital immunodeficiency disorders, however, precludes a substantial contribution to the increasing incidence of NHL, and subtypes of lymphoma have not been described systematically.

## Specific Infectious Agents

Certain infectious agents, which either precede or occur concomitantly with various immune-related conditions associated with NHL, may be etiologically important.

**Human immunodeficiency virus (HIV) infection.** Patients with acquired immunodeficiency secondary to HIV infection are at 59- to 104-fold risk of NHL (42,43). The cumulative incidence of NHL in HIV-infected subjects receiving antiretroviral therapy was 29% after 36 months (44). Among HIV-related NHL, high-grade B-cell subtypes predominate (45), especially immunoblastic and Burkitt's (small noncleaved) NHL (42), although diffuse subtypes also occur (43).

The excess of high-grade NHL in San Francisco, particularly

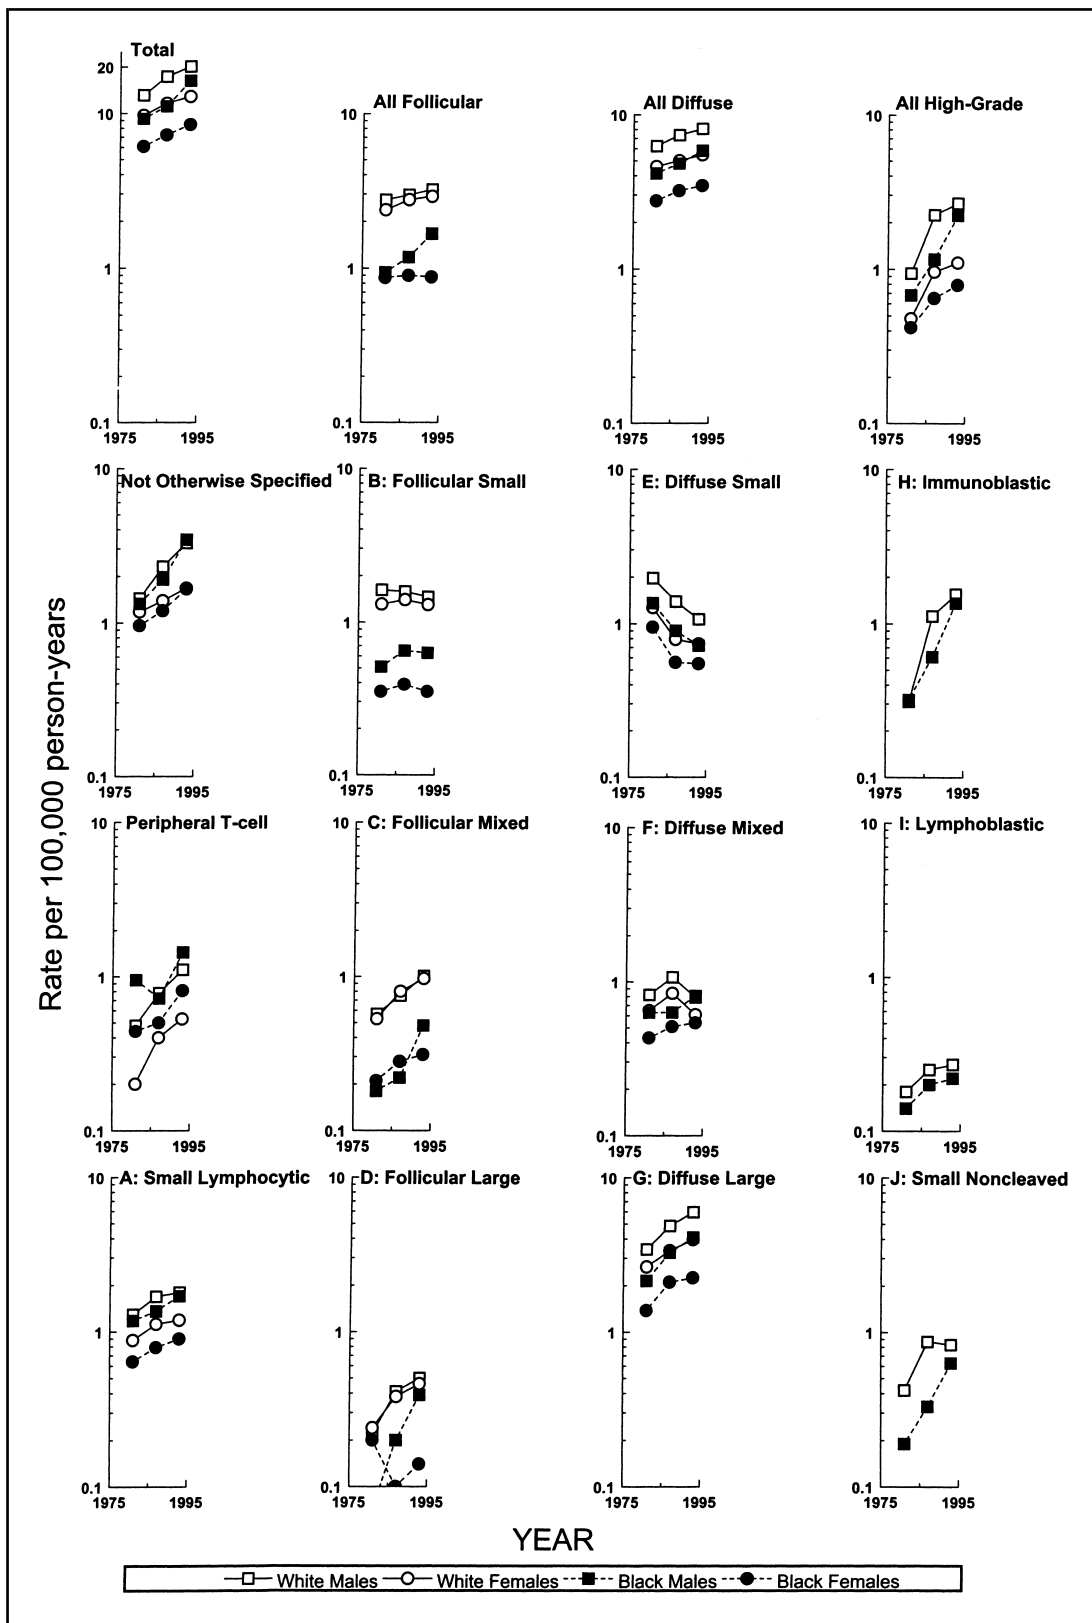

**Fig. 2.** Trends in age-adjusted (U.S. population, 1970) incidence rates for non-Hodgkin's lymphoma in nine Surveillance, Epidemiology, and End Results areas (from 1978–1983 through 1990–1995).

among unmarried white males, probably reflects the burden of HIV infection (46), although incidence rates were elevated in San Francisco whites of both sexes in earlier national cancer surveys conducted during 1947–1948 (47) and 1969–1971 (48). Acquired immunodeficiency syndrome (AIDS) accounts for a relatively small fraction of NHL, however, in the total geographic regions covered by the SEER registries (17,46,49).

**Hepatitis C virus (HCV) infection.** Findings of a relation between HCV and NHL are mixed. Associations of HCV with B-cell NHL (50) and with follicular and gastric mucosa-associated lymphoid tissue (MALT) NHL (51), but not with intermediate- or high-grade NHL (52), have been reported in some studies. A nationwide survey from 1988 through 1994 estimated 1.8% seroprevalence of HCV, higher in males than in

females and in non-Hispanic blacks than in whites (53). The etiologic role of HCV in NHL, however, is not yet well established.

**Human T-lymphotropic virus (HTLV) types I/II.** Infection with HTLV-I, especially in early childhood, is associated with subsequent excesses of peripheral T-cell NHL in southeastern Japan and in the Caribbean (54–56), but this retrovirus causes only about 10% of mycosis fungoides and Sézary syndrome in the United States (57,58). Combined HTLV-I/II infections are also exceedingly rare in the United States, with seroprevalence ranging from 0.03% to 4.2% in military service applicants (59), blood donors (60,61), forensic autopsy subjects (62), and emergency room and clinic patient populations (63,64). U.S. intravenous drug users make up a small fraction of the population, so even though 25% of them are infected with HTLV-I/II (65–67), they would have a negligible effect on NHL rates.

**Helicobacter pylori.** Although primary gastric lymphomas are mostly high-grade NHL, low-grade B-cell MALT gastric lymphomas are frequently preceded by unrecognized infection with *H. pylori* (68). Eradication of the infection in early-stage NHL can result in tumor regression (68).

**Epstein-Barr virus (EBV).** Post-transplant lymphoproliferative disorders (PTLDs) developing within 6 months as clinically aggressive lymphomas of donor cell origin and NHL among AIDS patients are thought to result from uncontrolled proliferation of EBV-transformed B lymphocytes in the setting of immune dysfunction (23,69–72). The PTLDs include plasmacytic hyperplasias, polymorphic lymphoproliferative disorders, and frank malignant lymphomas (72). Primary immunodeficiency disorders such as X-linked lymphoproliferative disease may also first become manifest after EBV infection (73). Burkitt's (small noncleaved) lymphoma in Africa is a distinct entity arising among children in a defined geographic belt (74). Early EBV infection has been consistently associated with African Burkitt's lymphoma on the basis of epidemiologic, serologic, and molecular studies (73). Malaria has been identified as a cofactor based on the overlapping geographic distribution, the high rates in the same population, and reduction in both after chloroquine prophylaxis (73).

In the United States, the rarity of HTLV-I, the declining prevalence of *H. pylori* (75), and the ubiquity of EBV infection suggest that these agents are unlikely to explain the increases in NHL.

### Blood Transfusions

Blood transfusions, which may transmit infectious agents and other immune-modulating antigenic exposures, have not been associated with NHL in a large Swedish cohort (76) or in two U.S. studies (77,78). Thus, there is little evidence that the dramatic rise in blood transfusions in the last five decades (79,80) contributed to the rising rates of NHL.

### Agricultural and Pesticide Exposures

NHL has been linked with exposure to pesticides, crops, and livestock. Italian farmers and animal breeders were found to have twofold risks of low-grade NHL (81), and U.S. farmers had a twofold risk of lymphocytic NHL (82). A U.S. population-based, case-control study found small excesses of follicular NHL among meat packaging and processing workers (83).

The use of agricultural herbicides (particularly 2,4-

dichlorophenoxyacetic acid) was associated with a notable dose-response effect for NHL, particularly among farmers who mixed and applied the compounds themselves (84). Herbicides increased the risk of follicular large-cell NHL in Nebraska (85), whereas modest increases for small lymphocytic (associated with certain crops and pesticide categories) and diffuse (linked with specific herbicides and pesticides) NHL occurred among farmers in Iowa and Minnesota (86). Total U.S. pesticide use rose from 647 million pounds in 1964 to 1144 million pounds in 1979 and then declined to 973 million pounds in 1995 (87). The role of agricultural and residential pesticides in the etiology of NHL requires further evaluation. The relatively small numbers of agricultural, lawn care, and pesticide manufacturing workers and pesticide applicators suggest that these workers account for only a modest fraction of the NHL increase in the general population.

### Lifestyle Factors

**Diet.** Milk (88), red meat (89,90), and butter, liver, and ham (91) have been associated with increased risks of NHL, whereas fruit (particularly citrus) (88,89), carrots, and whole-grain dietary products (91) have been linked with reduced risks. In one study (90), risks rose with increasing estimated serum retinol levels and declined with increasing estimated  $\beta$ -carotene levels. High intake of red meat, *trans*-unsaturated fat, and saturated fat was also linked with increased risks in the Nurses' Health Study cohort (92).

**Cigarette smoking.** Most large cohort and case-control studies of cigarette smoking and cancer (93–95) have detected little effect of smoking on risk of NHL. Smoking was linked with high-grade NHL in several case-control studies (91,96,97) and with follicular NHL in a few cohort studies (98,99).

**Hair dye.** Findings are inconsistent, with small increases in incidence of follicular NHL (100) or NHL mortality (101) associated with hair dye use (particularly black or brown dyes used for  $\geq 10$  years) found in some but not in other (102,103) large cohort or case-control studies.

**UV radiation.** Spatial and temporal correlations in incidence rates for nonmelanoma skin cancer and NHL have been hypothesized to support a link between solar UV radiation (UVR) and NHL (104); the proposed mechanism involves an immunosuppressive effect of UVR. Swedish investigators (105) described increased risks of NHL and chronic lymphocytic leukemia subsequent to melanoma and nonmelanoma skin cancers and excesses of both types of skin cancer subsequent to NHL. In England and Wales, ambient solar UV levels have been correlated with NHL incidence (106), and women (but not men) in outdoor occupations were found to have an increased risk of NHL (107). Ecologic studies (108,109) have shown NHL to be inversely, although weakly, correlated with latitude in European but not in U.S. Caucasians. Analytic investigations would help to clarify whether solar UVR is associated with NHL.

Relatively few studies have addressed diet, smoking, or other lifestyle risk factors for NHL; the effect of these exposures on NHL risk, if any, has yet to be firmly established and seems unlikely to explain the increasing trends.

### Genetic Factors

Yunis et al. (110) found 14;18 chromosomal translocations associated with follicular NHL, 8;14 translocations linked with Burkitt's lymphoma (classified here with small noncleaved



NHL), and trisomy 12 increased in small lymphocytic NHL. The q32 band on chromosome 14 is the most common breakpoint in NHL (111). The t(14;18) (q32;q21) translocation, involving the bcl-2 gene, occurs in 90% of follicular lymphomas (112) and in some patients with non-neoplastic lymphoproliferation (113). The increased chromosome breakages and rearrangements involving 14q32 and 18q21 observed in healthy pesticide fumigators have not yet been linked with NHL characterized by t(14;18) (q32;q21) translocations (114). The well-established, nonrandom cytogenetic translocations or other genetic lesions characterizing certain NHL subtypes may be associated with different etiologies but do not explain the increasing trends. Familial aggregation and the notable occurrence of various immunologic abnormalities among multiple-case family members with and without NHL or related lymphoproliferative neoplasms may reflect genetic factors and/or gene-environment interaction, but such familial occurrence does not account for the rising incidence (115).

### Demographic and Temporal Variation in NHL Incidence

An earlier study (116) evaluated SEER Program NHL subtype-specific data (from 1973 through 1987) for all races combined. Our more detailed assessment, revealing important differences in age, sex, race, geographic, and recent trend patterns from 1978 through 1995, suggests differing etiologies of NHL subtypes. Data from the limited number of available analytic studies, however, do not consistently support subtype-specific variation in risk of NHL.

The onset of the rising NHL incidence is difficult to ascertain, although Connecticut Tumor Registry data have shown fourfold to sixfold increases in NHL since 1935 (117). Other U.S. NHL data are lacking before World War II, since NHL was first evaluated as a separate entity in the late 1940s (47) and was initially categorized only as lymphosarcoma or reticulosarcoma in the late 1960s (9,48).

In the consideration of patterns by histologic type, the potential impact of unclassified cases needs to be addressed. The proportion NOS was higher among blacks than among whites, which could reduce the true type-specific white/black rate ratios (Table 2), but the general patterns observed are most likely real. The higher NOS rates among middle-aged than among older persons (Fig. 1) and the notably higher rates among males than among females may suggest that these NOS cases were actually aggressive high-grade lymphomas. The more rapid temporal increases in NOS compared with total NHL reduces concern that improving specificity of classification contributed to the increases observed in many of the NHL subtypes.

Reasons for the increasing incidence of most NHL subtypes are obscure, since well-established major risk factors (e.g., immunosuppression, autoimmunity, and HIV infection) explain, at most, a small fraction of the cases (49,118). The increase is larger than could be explained on the basis of changing diagnostic practices or misclassification (119). Only diffuse small NHL declined, probably because of changing diagnostic practice (120). The meteoric rise in high-grade AIDS-related lymphomas in the 1980s constitutes only 7%–13% of all NHL in the total geographic regions covered by SEER registries (46,49). The rapid increase in follicular NHL among black males remains puzzling.

### New Approaches to the Classification of the NHLs

In 1994, the International Lymphoma Study Group proposed a revised European-American lymphoma (REAL) classification (121), with defined subgroups confirmed to have prognostic significance (122). Newly proposed revisions of the World Health Organization (WHO) classification of lymphomas rely heavily on the REAL classification (123), and the new ICD-O-3 field trial version (124) incorporates the WHO classification. Our analysis included cases diagnosed from 1978 through 1995, and the data have not been recoded to the new system. Immunophenotype is an indispensable element of this classification, but we found specification of T- versus B-cell lacking for more than half of NHL cases diagnosed during the 1990s. A recent review of the epidemiology of the REAL classification subtypes of NHL (125) illustrates the potential usefulness of this nomenclature as an aid to descriptive epidemiology.

### Conclusion

Our data suggest that evaluation of epidemiologic patterns of NHL according to histologic subtype remains highly informative. While analytic studies have not consistently shown clear variation in NHL risk factors by subtype, the small number of such investigations does not permit firm conclusions. Future epidemiologic studies of NHL should evaluate risk factors according to the six major categories in this study as well as the WHO classification, since we find major incidence variation by age, sex, race, geographic area, and time period.

### REFERENCES

- (1) Greenlee RT, Murray T, Bolden S, Wingo PA. Cancer statistics, 2000. *CA Cancer J Clin* 2000;50:7–33.
- (2) Devesa SS, Fears T. Non-Hodgkin's lymphoma time trends: United States and international data. *Cancer Res* 1992;52(19 Suppl):5432s–5440s.
- (3) Coleman MP, Esteve J, Damiecki P, Arslan A, Renard H. Trends in cancer incidence and mortality. *IARC Sci Publ* 1993;121:1–806.
- (4) Newton R, Ferlay J, Beral V, Devesa SS. The epidemiology of non-Hodgkin's lymphoma: comparison of nodal and extra-nodal sites. *Int J Cancer* 1997;72:923–30.
- (5) Dick FR, Van Lier S, Banks P, Frizzera G, Witrak G, Everett G, et al. Comparison of methods of recording subclasses of non-Hodgkin's lymphoma for use in epidemiologic studies. *Am J Epidemiol* 1985;122:542.
- (6) Dick FR, VanLier SF, McKee K, Everett GD, Blair A. Nonconcurrency in abstracted diagnoses of non-Hodgkin's lymphoma. *J Natl Cancer Inst* 1987;78:675–8.
- (7) Neiman RS, Cain K, Ben Arieh Y, Harrington D, Mann RB, Wolf BC. A comparison between the Rappaport Classification and Working Formulation in cooperative group trials: the ECOG experience. *Hematol Pathol* 1992;6:61–70.
- (8) Ries LA, Kosary CL, Hankey BF, Miller BA, Hurray A, Edwards BK, editors. *SEER Cancer Statistics Review: 1973–94*. Bethesda (MD): National Cancer Institute; 1997 [DHHS Publ No. (NIH)97-2789].
- (9) Percy CL, Berg JW, Thomas LB, editors. *Manual of tumor nomenclature and coding*. New York (NY): American Cancer Society; 1968.
- (10) World Health Organization (WHO). *ICD-O International Classification of Diseases for Oncology*. Geneva (Switzerland): WHO; 1976.
- (11) Percy C, Van Holten V, Muir C, editors. *International Classification of Diseases for Oncology*. 2nd ed. Geneva (Switzerland): World Health Organization; 1990.
- (12) The Non-Hodgkin's Lymphoma Pathologic Classification Project. National Cancer Institute sponsored study of classifications of non-Hodgkin's lymphomas: summary and description of a working formulation for clinical usage. *Cancer* 1982;49:2112–35.
- (13) Percy C, O'Connor G, Ries LG, Jaffe ES. Non-Hodgkin's lymphomas. Application of the International Classification of Diseases for Oncology (ICD-O) to the Working Formulation. *Cancer* 1984;54:1435–8.

- (14) Devesa SS, Donaldson J, Fears T. Graphical presentation of trends in rates. *Am J Epidemiol* 1995;141:300–4.
- (15) Miettinen OS, Nurminen M. Comparative analysis of two rates. *Stat Med* 1985;4:213–26.
- (16) Holly EA, Lele C. Non-Hodgkin's lymphoma in HIV-positive and HIV-negative homosexual men in the San Francisco Bay Area: allergies, prior medication use, and sexual practices. *J Acquir Immune Defic Syndr Hum Retrovirol* 1997;15:211–22.
- (17) Holly EA, Lele C, Bracci P, McGrath MS. Case-control study of non-Hodgkin's lymphoma among women and heterosexual men in the San Francisco Bay Area, California. *Am J Epidemiol* 1999;150:375–89.
- (18) Hoover R, Fraumeni JF Jr. Risk of cancer in renal-transplant recipients. *Lancet* 1973;2:55–7.
- (19) Hoover RN. Lymphoma risks in populations with altered immunity—a search for mechanism. *Cancer Res* 1992;52(19 Suppl):5477s–5478s.
- (20) Kinlen LJ, Sheil AG, Peto J, Doll R. Collaborative United Kingdom–Australasian study of cancer in patients treated with immunosuppressive drugs. *Br Med J* 1979;2:1461–6.
- (21) Opelz G, Henderson R. Incidence of non-Hodgkin lymphoma in kidney and heart transplant recipients. *Lancet* 1993;342:1514–6.
- (22) Witherspoon RP, Fisher LD, Schoch G, Martin P, Sullivan KM, Sanders J, et al. Secondary cancers after bone marrow transplantation for leukemia or aplastic anemia. *N Engl J Med* 1989;321:784–9.
- (23) Curtis RE, Travis LB, Rowlings PA, Socie G, Kingma DW, Banks PM, et al. Risk of lymphoproliferative disorders after bone marrow transplantation: a multi-institutional study. *Blood* 1999;94:2208–16.
- (24) Wotherspoon AC, Diss TC, Pan L, Singh N, Whelan J, Isaacson PG. Low grade gastric B-cell lymphoma of mucosa associated lymphoid tissue in immunocompromised patients. *Histopathology* 1996;28:129–34.
- (25) Penn I. Tumors after renal and cardiac transplantation. *Hematol Oncol Clin North Am* 1993;7:431–45.
- (26) Bureau of Health Resources Development, Division of Organ Transplantation. 1997 Annual report of the U.S. Scientific Registry for Transplant Recipients and the Organ Procurement and Transplantation Network—Transplant Data: 1988–1996. Bethesda (MD): U.S. Department of Health and Human Services, Health Resources and Services Administration; 1997.
- (27) Holmes GK, Stokes PL, Sorahan TM, Prior P, Waterhouse JA, Cooke WT. Coeliac disease, gluten-free diet, and malignancy. *Gut* 1976;17:612–9.
- (28) Leonard JN, Tucker WF, Fry JS, Coulter CA, Boylston AW, McMinn RM, et al. Increased incidence of malignancy in dermatitis herpetiformis. *Br Med J (Clin Res Ed)* 1983;286:16–8.
- (29) Pettersson T, Pukkula E, Teppo L, Friman C. Increased risk of cancer in patients with systemic lupus erythematosus. *Ann Rheum Dis* 1992;51:437–9.
- (30) Mellemkjaer L, Andersen V, Linet MS, Gridley G, Hoover R, Olsen JH. Non-Hodgkin's lymphoma and other cancers among a cohort of patients with systemic lupus erythematosus. *Arthritis Rheum* 1997;40:761–8.
- (31) Kassan SS, Thomas TL, Moutsopoulos HM, Hoover R, Kimberly RP, Budman DR, et al. Increased risk of lymphoma in sicca syndrome. *Ann Intern Med* 1978;89:888–92.
- (32) Kinlen LJ. Incidence of cancer in rheumatoid arthritis and other disorders after immunosuppressive treatment. *Am J Med* 1985;78(1A):44–9.
- (33) Prior P. Cancer and rheumatoid arthritis: epidemiologic considerations. *Am J Med* 1985;78(1A):15–21.
- (34) Laakso M, Mutru O, Isomaki H, Koota K. Cancer mortality in patients with rheumatoid arthritis. *J Rheumatol* 1986;13:522–6.
- (35) Pearce N, Porta M. Association of non-Hodgkin's lymphoma with rheumatoid arthritis. *Am J Med* 1986;81:747–8.
- (36) Silman AJ, Petrie J, Hazleman B, Evans SJ. Lymphoproliferative cancer and other malignancy in patients with rheumatoid arthritis treated with azathioprine: a 20 year follow up study. *Ann Rheum Dis* 1988;47:988–92.
- (37) Gridley G, Klippel JH, Hoover RN, Fraumeni JF Jr. Incidence of cancer among men with the Felty syndrome. *Ann Intern Med* 1994;120:35–9.
- (38) Mellemkjaer L, Linet MS, Gridley G, Frisch M, Moller H, Olsen JH. Rheumatoid arthritis and cancer risk. *Eur J Cancer* 1996;32A:1753–7.
- (39) Gabriel SE, Crowson CS, O'Fallon WM. The epidemiology of rheumatoid arthritis in Rochester, Minnesota, 1955–1985. *Arthritis Rheum* 1999;42:415–20.
- (40) Uramoto KM, Michet CJ Jr, Thumboo J, Sunku J, O'Fallon WM, Gabriel SE. Trends in the incidence and mortality of systemic lupus erythematosus, 1950–1992. *Arthritis Rheum* 1999;42:46–50.
- (41) Filipovich AH, Mathur A, Kamat D, Shapiro RS. Primary immunodeficiencies: genetic risk factors for lymphoma. *Cancer Res* 1992;52(19 Suppl):5465s–5467s.
- (42) Beral V, Peterman T, Berkelman R, Jaffe H. AIDS-associated non-Hodgkin lymphoma. *Lancet* 1991;337:805–9.
- (43) Rabkin CS, Biggar RJ, Horm JW. Increasing incidence of cancers associated with the human immunodeficiency virus epidemic. *Int J Cancer* 1991;47:692–6.
- (44) Pluda JM, Venzon DJ, Tosato G, Lietzau J, Wyvill K, Nelson DL, et al. Parameters affecting the development of non-Hodgkin's lymphoma in patients with severe human immunodeficiency virus infection receiving antiretroviral therapy. *J Clin Oncol* 1993;11:1099–107.
- (45) Ross R, Dworsky R, Paganini-Hill A, Levine A, Mack T. Non-Hodgkin's lymphomas in never-married men in Los Angeles. *Br J Cancer* 1985;52:785–7.
- (46) Gail MH, Pluda JM, Rabkin CS, Biggar RJ, Goedert JJ, Horm JW, et al. Projections of the incidence of non-Hodgkin's lymphoma related to acquired immunodeficiency syndrome. *J Natl Cancer Inst* 1991;83:695–701.
- (47) Dorn HF, Cutler SJ. Morbidity from cancer in the United States, part II. *Public Health Monograph No. 56, 1958; Table 32, p. 86.*
- (48) Cutler SJ, Young JL. Third National Cancer Survey: incidence data. NCI Monograph No. 41. Bethesda (MD): National Cancer Institute. 1975 [DHEW Publ No. (NIH)75-787].
- (49) Hartge P, Devesa SS. Quantification of the impact of known risk factors on time trends in non-Hodgkin's lymphoma incidence. *Cancer Res* 1992;52(19 Suppl):5566s–5569s.
- (50) Silvestri F, Pipan C, Barillari G, Zaja F, Fanin R, Infanti L, et al. Prevalence of hepatitis C virus infection in patients with lymphoproliferative disorders. *Blood* 1996;87:4296–301.
- (51) Luppi M, Grazia Ferrari M, Bonaccorsi G, Longo G, Narni F, Barozzi P, et al. Hepatitis C virus infection in subsets of neoplastic lymphoproliferations not associated with cryoglobulinemia. *Leukemia* 1996;10:351–5.
- (52) Levine AM, Nelson R, Zuckerman E, Zuckerman T, Govindarajan S, Valinluck B, et al. Lack of association between hepatitis C infection and development of AIDS-related lymphoma. *J Acquir Immune Defic Syndr Hum Retrovirol* 1999;20:255–8.
- (53) Alter MJ, Kruszon-Moran D, Nainan OV, McQuillan GM, Gao F, Moyer LA, et al. The prevalence of hepatitis C virus infection in the United States, 1988 through 1994. *N Engl J Med* 1999;341:556–62.
- (54) Cleghorn FR, Manns A, Falk R, Hartge P, Hanchard B, Jack N, et al. Effect of human T-lymphotropic virus type I infection on non-Hodgkin's lymphoma incidence. *J Natl Cancer Inst* 1995;87:1009–14.
- (55) Mueller NE, Blattner WA. Retroviruses: HTLV. In: Evans AS, Kaslow R, editors. *Viral infections of humans: epidemiology and control*. 4th ed. New York (NY): Plenum Medical; 1997. p. 785–813.
- (56) Manns A, Hisada M, La Grenade L. Human T-lymphotropic virus type I infection. *Lancet* 1999;353:1951–8.
- (57) Bazarbachi A, Soriano V, Pawson R, Vallejo A, Moudgil T, Matutes E, et al. Mycosis fungoides and Sezary syndrome are not associated with HTLV-I infection: an international study. *Br J Haematol* 1997;98:927–33.
- (58) Diamandidou E, Cohen PR, Kurzrock R. Mycosis fungoides and Sezary syndrome. *Blood* 1996;88:2385–409.
- (59) Roberts CR, Fipps DR, Brundage JF, Wright SE, Goldenbaum M, Alexander SS, et al. Prevalence of human T-lymphotropic virus in civilian applicants for the United States Armed Forces. *Am J Public Health* 1992;82:70–3.
- (60) Lee HH, Swanson P, Rosenblatt JD, Chen IS, Sherwood WC, Smith DE, et al. Relative prevalence and risk factors of HTLV-I and HTLV-II infection in US blood donors. *Lancet* 1991;337:1435–9.
- (61) Murphy EL, Watanabe K, Nass CC, Ownby H, Williams A, Nemo G. Evidence among blood donors for a 30-year-old epidemic of human T lymphotropic virus type II infection in the United States. *J Infect Dis* 1999;180:1777–83.
- (62) Li L, Zhang X, Constantine NT, Smialek JE. Seroprevalence of parenterally transmitted viruses (HIV-1, HBV, HCV, and HTLV-I/II) in forensic autopsy cases. *J Forensic Sci* 1993;38:1075–83.

- (63) Kelen GD, DiGiovanna TA, Lofy L, Junkins E, Stein A, Sivertson KT, et al. Human T-lymphotropic virus (HTLV-I/II) infection among patients in an inner-city emergency department. *Ann Intern Med* 1990;113:368–72.
- (64) Agranoff D, Varney K, Khayam-Bashi H, Murphy EL. Human T-lymphotropic virus type II seroprevalence among emergency department and clinic patients. *West J Med* 1996;164:481–5.
- (65) Lee HH, Weiss SH, Brown LS, Mildvan D, Shorty V, Saravolatz L, et al. Patterns of HIV-I and HTLV-I/II in intravenous drug abusers from the middle atlantic and central regions of the USA. *J Infect Dis* 1990;162:347–52.
- (66) Cantor KP, Weiss SH, Goedert JJ, Battjes RJ. HTLV-I/II seroprevalence and HIV/HTLV coinfection among U.S. intravenous drug users. *J Acquir Immune Defic Syndr* 1991;4:460–7.
- (67) Khabbaz RF, Onorato IM, Cannon RO, Hartley TM, Roberts B, Hosein B, et al. Seroprevalence of HTLV-1 and HTLV-2 among intravenous drug users and persons in clinics for sexually transmitted diseases. *N Engl J Med* 1992;326:375–80.
- (68) Wotherspoon AC. Gastric lymphoma of mucosa-associated lymphoid tissue and *Helicobacter pylori*. *Annu Rev Med* 1998;49:289–99.
- (69) Swinnen LJ. Overview of posttransplant B-cell lymphoproliferative disorders. *Semin Oncol* 1999;26(5 Suppl 14):21–5.
- (70) Liebowitz D. Epstein-Barr virus and a cellular signaling pathway in lymphomas from immunosuppressed patients. *N Engl J Med* 1998;338:1413–21.
- (71) Goedert JJ, Cote TR, Virgo P, Scoppa SM, Kingma DW, Gail MH, et al. Spectrum of AIDS-associated malignant disorders. *Lancet* 1998;351:1833–9.
- (72) Knowles DM. Immunodeficiency-associated lymphoproliferative disorders. *Mod Pathol* 1999;12:200–17.
- (73) IARC Working Group on the Evaluation of Carcinogenic Risks to Humans. Epstein-Barr virus and Kaposi's sarcoma herpesvirus/human herpesvirus 8. Vol 70. Lyon (France): International Agency for Research on Cancer; 1997. p. 82–126.
- (74) Burkitt DP. Etiology of Burkitt's lymphoma—an alternative hypothesis to a vectored virus. *J Natl Cancer Inst* 1969;42:19–28.
- (75) Bhattacharya I. US prevalence of *Helicobacter pylori* may plummet in the next century. *Lancet* 1999;353:1859.
- (76) Adami J, Nyren O, Bergstrom R, Ekblom A, McLaughlin JK, Hogman C, et al. Blood transfusion and risk of non-Hodgkin lymphoma: lack of association. *Ann Intern Med* 1997;127:365–71.
- (77) Cerhan JR, Wallace RB, Folsom AR, Potter JD, Sellers TA, Zheng W, et al. Medical history risk factors for non-Hodgkin's lymphoma in older women. *J Natl Cancer Inst* 1997;89:314–8.
- (78) Nelson RA, Levine AM, Bernstein L. Blood transfusions and the risk of intermediate- or high-grade non-Hodgkin's lymphoma. *J Natl Cancer Inst* 1998;90:1742–3.
- (79) National Heart, Lung, and Blood Institute (NHLB). Summary report: NHLB's blood resource studies. Bethesda (MD): National Institutes of Health, NHLB; 1972. [DHEW Publ No. (NIH)73-416]. p. 27.
- (80) Goodnough LT, Brecher ME, Kanter MH, AuBuchon JP. Transfusion medicine. First of I. Blood transfusion. *N Engl J Med* 1999; 340:438–47.
- (81) Amadori D, Nanni O, Falcini F, Saragoni A, Tison V, Callea A, et al. Chronic lymphocytic leukaemias and non-Hodgkin's lymphomas by histological type in farming-animal breeding workers: a population case-control study based on job titles. *Occup Environ Med* 1995;52:374–9.
- (82) Schumacher MC. Farming occupations and mortality from non-Hodgkin's lymphoma in Utah. A case-control study. *J Occup Med* 1985;27:580–4.
- (83) Tatham L, Tolbert P, Kjeldsberg C. Occupational risk factors for subgroups of non-Hodgkin's lymphoma. *Epidemiology* 1997;8:551–8.
- (84) Hoar SK, Blair A, Holmes FF, Boysen CD, Robel RJ, Hoover R, et al. Agricultural herbicide use and risk of lymphoma and soft-tissue sarcoma. *JAMA* 1986;256:1141–7.
- (85) Weisenburger D, Zahm S, Ward M, Babbitt P, Holmes F, Boysen C, et al. Non-Hodgkin's lymphoma associated with the agricultural use of herbicides: analysis by histologic type [abstract]. *Mod Pathol* 1990;3:105A.
- (86) Cantor KP, Blair A, Everett G, Gibson R, Burmeister LF, Brown LM, et al. Pesticides and other agricultural risk factors for non-Hodgkin's lymphoma among men in Iowa and Minnesota. *Cancer Res* 1992;52:2447–55.
- (87) Aspelin AL. Pesticides sales and usage: 1994 and 1995 market estimates. Washington (DC): Biological and Economic Analysis Division, Office of Pesticide Programs, Office of Prevention, Pesticides, and Toxic Substances, US Environmental Protection Agency; 1997 [EPA Publ No. 833-R-97-002]. p. 22.
- (88) Ward MH, Zahm SH, Weisenburger DD, Gridley G, Cantor KP, Saal RC, et al. Dietary factors and non-Hodgkin's lymphoma in Nebraska (United States). *Cancer Causes Control* 1994;5:422–32.
- (89) Chiu BC, Cerhan JR, Folsom AR, Sellers TA, Kushi LH, Wallace RB, et al. Diet and risk of non-Hodgkin lymphoma in older women. *JAMA* 1996;275:1315–21.
- (90) De Stefani E, Fierro L, Barrios E, Ronco A. Tobacco, alcohol, diet and risk of non-Hodgkin's lymphoma: a case-control study in Uruguay. *Leuk Res* 1998;22:445–52.
- (91) Tavani A, Pregnolato A, Negri E, Franceschi S, Serraino D, Carbone A, et al. Diet and risk of lymphoid neoplasms and soft tissue sarcomas. *Nutr Cancer* 1997;27:256–60.
- (92) Zhang S, Hunter DJ, Rosner BA, Colditz GA, Fuchs CS, Speizer FE, et al. Dietary fat and protein in relation to risk of non-Hodgkin's lymphoma among women. *J Natl Cancer Inst* 1999;91:1751–8.
- (93) Hammond EC, Horn D. Smoking and death rates—report on forty-four months of follow-up of 187,783 men. *JAMA* 1958;166:1294–308.
- (94) McLaughlin JK, Hrubec Z, Blot WJ, Fraumeni JF Jr. Smoking and cancer mortality among U.S. veterans: a 26-year follow-up. *Int J Cancer* 1995; 60:190–3.
- (95) Adami J, Nyren O, Bergstrom R, Ekblom A, Engholm G, Englund A, et al. Smoking and the risk of leukemia, lymphoma, and multiple myeloma (Sweden). *Cancer Causes Control* 1998;9:49–56.
- (96) Brown LM, Everett GD, Gibson R, Burmeister LF, Schuman LM, Blair A. Smoking and risk of non-Hodgkin's lymphoma and multiple myeloma. *Cancer Causes Control* 1992;3:49–55.
- (97) Freedman DS, Tolbert PE, Coates R, Brann EA, Kjeldsberg CR. Relation of cigarette smoking to non-Hodgkin's lymphoma among middle-aged men. *Am J Epidemiol* 1998;148:833–41.
- (98) Linet MS, McLaughlin JK, Hsing AW, Wacholder S, Co Chien HT, Schuman LM, et al. Is cigarette smoking a risk factor for non-Hodgkin's lymphoma or multiple myeloma? Results from the Lutheran Brotherhood Cohort Study. *Leuk Res* 1992;16:621–4.
- (99) Herrinton LJ, Friedman GD. Cigarette smoking and risk of non-Hodgkin's lymphoma subtypes. *Cancer Epidemiol Biomarkers Prev* 1998;7:25–8.
- (100) Zahm SH, Weisenburger DD, Babbitt PA, Saal RC, Vaught JB, Blair A. Use of hair coloring products and the risk of lymphoma, multiple myeloma, and chronic lymphocytic leukemia. *Am J Public Health* 1992;82: 990–7.
- (101) Altekruse SF, Henley SJ, Thun MJ. Deaths from hematopoietic and other cancers in relation to permanent hair dye use in a large prospective study (United States). *Cancer Causes Control* 1999;10:617–25.
- (102) Grodstein F, Hennekens CH, Colditz GA, Hunter DJ, Stampfer MJ. A prospective study of permanent hair dye use and hematopoietic cancer. *J Natl Cancer Inst* 1994;86:1466–70.
- (103) Holly EA, Lele C, Bracci PM. Hair-color products and risk for non-Hodgkin's lymphoma: a population-based study in the San Francisco bay area. *Am J Public Health* 1998;88:1767–73.
- (104) Cartwright R, McNally R, Staines A. The increasing incidence of non-Hodgkin's lymphoma (NHL): the possible role of sunlight. *Leuk Lymphoma* 1994;14:387–94.
- (105) Adami J, Frisch M, Yuen J, Glimelius B, Melbye M. Evidence of an association between non-Hodgkin's lymphoma and skin cancer. *BMJ* 1995;310:1491–5.
- (106) Benthall G. Association between incidence of non-Hodgkin's lymphoma and solar ultraviolet radiation in England and Wales. *BMJ* 1996;312: 1128–31.
- (107) Newton R, Roman E, Fear N, Carpenter L. Non-Hodgkin's lymphoma and solar ultraviolet radiation. Data are inconsistent [letter]. *BMJ* 1996;313: 298.
- (108) McMichael AJ, Giles GG. Have increases in solar ultraviolet exposure contributed to the rise in incidence of non-Hodgkin's lymphoma? *Br J Cancer* 1996;73:945–50.
- (109) Hartge P, Devesa SS, Grauman D, Fears TR, Fraumeni JF Jr. Non-Hodgkin's lymphoma and sunlight. *J Natl Cancer Inst* 1996;88:298–300.

- (110) Yunis JJ, Oken MM, Kaplan ME, Ensrud KM, Howe RR, Theologides A. Distinctive chromosomal abnormalities in histologic subtypes of non-Hodgkin's lymphoma. *N Engl J Med* 1982;307:1231-6.
- (111) Levine EG, Bloomfield CD. Cytogenetics of non-Hodgkin's lymphoma. *J Natl Cancer Inst Monogr* 1990;10:7-12.
- (112) Weiss LM, Warnke RA, Sklar J, Cleary ML. Molecular analysis of the t(14;18) chromosomal translocation in malignant lymphomas. *N Engl J Med* 1987;317:1185-9.
- (113) Poetsch M, Weber-Matthiesen K, Plendl HJ, Grote W, Schlegelberger B. Detection of the t(14;18) chromosomal translocation by interphase cytogenetics with yeast-artificial-chromosome probes in follicular lymphoma and nonneoplastic lymphoproliferation. *J Clin Oncol* 1996;14:963-9.
- (114) Garry VF, Tarone RE, Long L, Griffith J, Kelly JT, Burroughs B. Pesticide applicators with mixed pesticide exposure: G-banded analysis and possible relationship to non-Hodgkin's lymphoma. *Cancer Epidemiol Biomarkers Prev* 1996;5:11-6.
- (115) Linet MS, Pottern LM. Familial aggregation of hematopoietic malignancies and risk of non-Hodgkin's lymphoma. *Cancer Res* 1992;52(19 Suppl):5468s-5473s.
- (116) Greiner TC, Medeiros LJ, Jaffe ES. Non-Hodgkin's lymphoma. *Cancer* 1995;75(1 Suppl):370-80.
- (117) Zheng T, Mayne ST, Boyle P, Holford TR, Liu WL, Flannery J. Epidemiology of non-Hodgkin lymphoma in Connecticut, 1935-1988. *Cancer* 1992;70:840-9.
- (118) Rabkin CS, Devesa SS, Zahm SH, Gail MH. Increasing incidence of non-Hodgkin's lymphoma. *Semin Hematol* 1993;30:286-96.
- (119) Hartge P, Devesa SS, Fraumeni JF Jr. Hodgkin's and Non-Hodgkin's lymphomas. *Cancer Surv* 1994;19-20:423-53.
- (120) Banks PM. Changes in diagnosis of non-Hodgkin's lymphomas over time. *Cancer Res* 1992;52(19 Suppl):5453s-5455s.
- (121) Harris NL, Jaffe ES, Stein H, Banks PM, Chan JK, Cleary ML, et al. A revised European-American classification of lymphoid neoplasms: a proposal from the International Lymphoma Study Group. *Blood* 1994;84:1361-92.
- (122) The Non-Hodgkin's Lymphoma Classification Project. A clinical evaluation of the International Lymphoma Study Group classification of non-Hodgkin's lymphoma. *Blood* 1997;89:3909-18.
- (123) Jaffe ES, Harris NL, Diebold J, Muller-Hermelink HK. World Health Organization classification of neoplastic diseases of the hemopoietic and lymphoid tissues. A progress report. *Am J Clin Pathol* 1999;111(1 Suppl 1):S8-12.
- (124) Fritz A, Percy C, editors. *International Classification of Diseases for Oncology*. 3rd ed. U.S. field trial version. Bethesda (MD): National Cancer Institute; 1999.
- (125) Herrinton LJ. Epidemiology of the Revised European-American Lymphoma Classification subtypes. *Epidemiol Rev* 1998;20:187-203.

## NOTES

<sup>1</sup>*Editor's note:* SEER is a set of geographically defined, population-based, central cancer registries in the United States, operated by local nonprofit organizations under contract to the National Cancer Institute (NCI). Registry data are submitted electronically without personal identifiers to the NCI on a biannual basis, and the NCI makes the data available to the public for scientific research.

We appreciate the sustained high-quality registry operations of the SEER Program participants, the dedication of the NCI SEER staff, and the computer programming and figure development by Joan Hertel and Stella Semiti of IMS, Inc., Rockville, MD. We also acknowledge the careful review and helpful suggestions of the members of the Editorial Committee for the Cancer Surveillance Series: Drs. Rachel Ballard-Barbash, Brenda Edwards, Rocky Feuer, Ben Hankey (all from the Division of Cancer Control and Population Sciences, NCI), and Shelia Zahm (Division of Cancer Epidemiology and Genetics, NCI). Dr. Robert Tarone (Division of Cancer Epidemiology and Genetics, NCI) also provided useful comments.

Manuscript received December 7, 1999; revised May 16, 2000; accepted May 23, 2000.
